# Supplementary material for: A citizen science model for implementing statewide educational DNA barcoding
Source: PubMed Central journal article supplement (PMC6328199; doi:10.1371/journal.pone.0208604), 2019-01-10
Supplement: pone.0208604.s001.pdf [file pone.0208604.s001.pdf]

S1 Table. Collection data for specimens investigated in the project with attributions to contributing students and PhD scientist mentors.

| MV Rego # | Voucher specimen | Common name               | Scientific name                | Collection date | Locality                                                                                               | Genbank accession number | Contributors                                                                                                                                                                                                                                                                                                                |
|-----------|------------------|---------------------------|--------------------------------|-----------------|--------------------------------------------------------------------------------------------------------|--------------------------|-----------------------------------------------------------------------------------------------------------------------------------------------------------------------------------------------------------------------------------------------------------------------------------------------------------------------------|
| Z22563    | D75424           | Eastern three-lined skink | <i>Acritoscincus duperreyi</i> | 22/11/2012      | Black Range State Forest, Muirfoot Track,                                                              | n/a                      | K. Meiselbach <sup>1</sup> , M. Danaro <sup>1</sup> , T. Johanson <sup>1</sup> , S. Cassim <sup>1</sup> , B. Luke <sup>14</sup> , A. Barimah <sup>14</sup> , B. Harris <sup>6</sup> , E. Hunt <sup>6</sup> , H. Dawes-Robb <sup>9</sup> , D. Samuel <sup>9</sup> , A. Koubar <sup>12</sup>                                  |
| Z22574    | D75418           | Eastern three-lined skink | <i>Acritoscincus duperreyi</i> | 22/11/2012      | Grampians National Park, The Pinnacle and Sundial Peak Picnic Area                                     | n/a                      | M. Pert <sup>1</sup> , M. Danaro <sup>1</sup> , F. Angrisano <sup>1</sup> , S. Chockalingam <sup>1</sup> , E. Callanan <sup>14</sup> , C. Hollingworth <sup>14</sup> , J.-L. Ross <sup>6</sup> , K. Elliott <sup>6</sup> , J. Jones-Rolls <sup>9</sup> , C. Puyol <sup>9</sup> , Linh <sup>12</sup> , Julie <sup>12</sup>   |
| Z22402    | D75343           | Jacky dragon              | <i>Amphibolurus muricatus</i>  | 19/11/2012      | Grampians National Park, Jananginj Njaui Track, 1.7-2.5km by road W of intersection with Red Rock Road | n/a                      | K. Meiselbach <sup>1</sup> , M. Danaro <sup>1</sup> , S. Longmuir <sup>1</sup> , S. Han <sup>1</sup> , J. Verity <sup>14</sup> , J. Rice <sup>14</sup> , M. Deckman <sup>6</sup> , M. Lochhead <sup>6</sup> , M. Harris <sup>9</sup> , F. Krucers-Ozolins <sup>9</sup> , L. Bolitho <sup>16</sup> , T. Robson <sup>16</sup> |
| Z22414    | D75337           | Jacky dragon              | <i>Amphibolurus muricatus</i>  | 19/11/2012      | Grampians National Park, intersection of Syphon Road and Glenelg River                                 | n/a                      | S. Walia <sup>1</sup> , F. Angrisano <sup>1</sup> , G. Jones <sup>1</sup> , J. Scanlan <sup>1</sup> , J. Kolanowski <sup>6</sup> , N. Evans <sup>6</sup> , D. Hopkins <sup>9</sup> , N. Le <sup>9</sup> , Jennifer <sup>9</sup> , Tien <sup>9</sup> , R. Redpath <sup>16</sup> , S. Steinkellner <sup>16</sup>              |
| Z27172    | D75634           | Jacky dragon              | <i>Amphibolurus muricatus</i>  | Nov-13          | Alpine National Park, Cobberas track                                                                   | MH028635                 | S. Ostrouska <sup>1</sup> , S. Longmuir <sup>1</sup> , A. Cutting <sup>1</sup> , Y. Pace <sup>1</sup> , M. Tucker <sup>3</sup> , M. Karlake <sup>3</sup> , C. Willie <sup>12</sup> , J. Lay <sup>12</sup> , J. Rasha <sup>12</sup> , D. Ali Ahmad <sup>12</sup> , E. Robinson <sup>10</sup> , K. Croft <sup>10</sup>        |
| Z29155    | D75668           | Jacky dragon              | <i>Amphibolurus muricatus</i>  | Nov-13          | Alpine National Park, Beloka Road Granite Outcrop                                                      | MH028622                 | J. Scanlan <sup>1</sup> , S. Han <sup>1</sup> , B. Wood <sup>1</sup> , S. Ostrouska <sup>1</sup> , J. Maori <sup>4</sup> , T. Tran <sup>4</sup> , R. Gonato <sup>7</sup> , C. Barn Father <sup>7</sup> , J. Vasilakis <sup>17</sup> , J. Crawford <sup>17</sup>                                                             |

|               |        |                                        |                                 |            |                                                                                               |     |                                                                                                                                                                                                                                             |
|---------------|--------|----------------------------------------|---------------------------------|------------|-----------------------------------------------------------------------------------------------|-----|---------------------------------------------------------------------------------------------------------------------------------------------------------------------------------------------------------------------------------------------|
| <b>Z22340</b> | D75403 | Marbled Gecko                          | <i>Christinus marmoratus</i>    | 21/11/2012 | Grampians National Park, Jananginj Njai Track                                                 | n/a | S. Walia <sup>1</sup> , S. Chau <sup>1</sup> , A. Chowdhury <sup>1</sup> , R. Vanstone <sup>6</sup> , K. Fleeton <sup>6</sup> , M. Halfyard <sup>13</sup> , M. Scanlon <sup>13</sup> , A. Radoja <sup>12</sup> , J. Pernice <sup>12</sup>   |
| <b>Z22408</b> | D75331 | Marbled Gecko                          | <i>Christinus marmoratus</i>    | 18/11/2012 | Grampians National Park, Cooinda Burrong Scout Camp                                           | n/a | E. Zuccala <sup>1</sup> , S. Moneer <sup>1</sup> , C. Abbott <sup>1</sup> , C. Douglas <sup>6</sup> , S. Peckham <sup>6</sup> , P. Cerdei <sup>11</sup> , A. Finne-Larson <sup>11</sup> , D. Lora <sup>12</sup> , N. Banney <sup>8</sup>    |
| <b>Z22533</b> | D75444 | Fence skink                            | <i>Cryptoblepharus pannosus</i> | 24/11/2012 | Grampians National Park, area surrounding Mount Zero Picnic Area and Hollow Mountain car park | n/a | J. Cuxson <sup>1</sup> , H. Vanyai <sup>1</sup> , A. Lun <sup>1</sup> , L. Wiratno <sup>8</sup> , N. Valeska <sup>8</sup> , S. Zhong <sup>5</sup> , L. Awad <sup>5</sup> , L. Nguyen <sup>7</sup> , D. Simpson <sup>7</sup>                 |
| <b>Z22535</b> | D75446 | Fence skink                            | <i>Cryptoblepharus pannosus</i> | 24/11/2012 | Grampians National Park, area surrounding Mount Zero Picnic Area and Hollow Mountain car park | n/a | K. Meiselbach <sup>1</sup> , S. Moneer <sup>1</sup> , S. Cassim <sup>1</sup> , S. Canham <sup>14</sup> , A. Lapojapo <sup>11</sup> , C. Amum <sup>11</sup> , J. Tomas <sup>11</sup> , J. Dang <sup>12</sup>                                 |
| <b>Z22519</b> | D75465 | Robust skink/<br>Eastern striped skink | <i>Ctenotus robustus</i>        | 24/11/2012 | Grampians National Park, area surrounding Mount Zero Picnic Area and Hollow Mountain car park | n/a | J. Cuxson <sup>1</sup> , S. Ostrouska <sup>1</sup> , C. Diaz <sup>1</sup> , L. McLachlan <sup>8</sup> , N. Jones <sup>8</sup> , David <sup>12</sup> , Leslie <sup>12</sup> , T. McLean-Ingletton <sup>17</sup> , B. Forrester <sup>17</sup> |

|               |        |                                           |                                 |            |                                                                                                              |          |                                                                                                                                                                                                                                                                                                                                                                                                                                                                        |
|---------------|--------|-------------------------------------------|---------------------------------|------------|--------------------------------------------------------------------------------------------------------------|----------|------------------------------------------------------------------------------------------------------------------------------------------------------------------------------------------------------------------------------------------------------------------------------------------------------------------------------------------------------------------------------------------------------------------------------------------------------------------------|
| <b>Z22531</b> | D75459 | Robust skink/<br>Eastern<br>striped skink | <i>Ctenotus<br/>robustus</i>    | 24/11/2012 | Grampians<br>National Park,<br>area surrounding<br>Mount Zero Picnic<br>Area and Hollow<br>Mountain car park | n/a      | M. Pert <sup>1</sup> , E. Zuccala <sup>1</sup> , S. Longmuir <sup>1</sup> , B. Dooley <sup>14</sup> , M. Lamb <sup>14</sup> , L. Matthias-Williamson <sup>6</sup> , J. Weller <sup>6</sup> , E. Trethewey <sup>9</sup> , N. Gaoulil <sup>9</sup>                                                                                                                                                                                                                       |
| <b>Z27200</b> | D75661 | Copper tailed<br>skink                    | <i>Ctenotus<br/>taeniolatus</i> | Nov-13     | Alpine National<br>Park, Beloka Road<br>Granite Outcrop                                                      | n/a      | S. Chau <sup>1</sup> , A. Nguyen <sup>1</sup> , H. McRae <sup>1</sup> , S. Preston <sup>1</sup> , N. Fisher <sup>3</sup> , T. D’Ombrain <sup>3</sup> , I. Zhimomi <sup>10</sup> , S. Prakash <sup>7</sup> , K. Cousevska <sup>7</sup> , A. Robinson <sup>19</sup> , C. Robinson <sup>19</sup>                                                                                                                                                                          |
| <b>Z27235</b> | D75698 | Copper tailed<br>skink                    | <i>Ctenotus<br/>taeniolatus</i> | Nov-13     | Alpine National<br>Park, Beloka Road<br>Granite Outcrop                                                      | n/a      | K.J. Tan <sup>1</sup> , S. Belluzzo <sup>1</sup> , H. McRae <sup>1</sup> , S. Ostrouska <sup>1</sup> , E. Cameron <sup>3</sup> , G. Gibb <sup>3</sup> , S. Kulg <sup>12</sup> , R. Nettasingha <sup>12</sup> , C. Anderson <sup>19</sup> , A. Walters <sup>19</sup> , B. Dewhurst <sup>17</sup> , B. Gibbons <sup>17</sup>                                                                                                                                             |
| <b>Z29153</b> | D75666 | Copper tailed<br>skink                    | <i>Ctenotus<br/>taeniolatus</i> | Nov-13     | Alpine National<br>Park, Beloka Road<br>Granite Outcrop                                                      | n/a      | N. Donker <sup>1</sup> , A. Cutting <sup>1</sup> , S. Longmuir <sup>1</sup> , L. Green <sup>1</sup> , A. McDonald <sup>3</sup> , J. Mirabella <sup>3</sup> , A. Le <sup>1</sup> , T. Auvale <sup>1</sup> , L.N.T. Bawi <sup>4</sup> , K. Kediye <sup>4</sup> , F. Inguillo <sup>17</sup> , C. Lees <sup>17</sup>                                                                                                                                                       |
| <b>Z29154</b> | D75667 | Copper tailed<br>skink                    | <i>Ctenotus<br/>taeniolatus</i> | Nov-13     | Alpine National<br>Park, Beloka Road<br>Granite Outcrop                                                      | n/a      | A. Nguyen <sup>1</sup> , J. Hawkey <sup>1</sup> , N. Donker <sup>1</sup> , S. Nguyen <sup>4</sup> , B. Huynh <sup>4</sup> , J. Patton <sup>7</sup> , S.-L. Missio <sup>7</sup> , C. Cutrupi <sup>7</sup> , S. McRostie <sup>19</sup> , J. Rainbow <sup>19</sup>                                                                                                                                                                                                        |
| <b>Z29307</b> | D75731 | Copper tailed<br>skink                    | <i>Ctenotus<br/>taeniolatus</i> | Nov-13     | Alpine National<br>Park, Snowy River<br>Road                                                                 | MH028632 | L. Green <sup>1</sup> , J. Hawkey <sup>1</sup> , Y. Pace <sup>1</sup> , S. Chau <sup>1</sup> , D. Kaur <sup>12</sup> , A. Nguyen <sup>12</sup> , M. Noori <sup>10</sup> , A. Miller <sup>17</sup> , S. Jacobs <sup>17</sup>                                                                                                                                                                                                                                            |
| <b>Z27192</b> | D75654 | Cunningham's<br>skink                     | <i>Egernia<br/>cunninghami</i>  | Nov-13     | Alpine National<br>Park, Beloka Road<br>Granite Outcrop                                                      | MH028630 | S. Moneer <sup>1</sup> , S. Ostrouska <sup>1</sup> , S. Longmuir <sup>1</sup> , S. Han <sup>1</sup> , A. Cutting <sup>1</sup> , N. Donker <sup>1</sup> , Z. Mousaco <sup>1</sup> , R. Meuwly <sup>1</sup> , L. Nguyen <sup>12</sup> , K. Cheng <sup>12</sup> , N. Anuwae <sup>4</sup> , A. Nguyen <sup>4</sup> , J. Frank <sup>4</sup> , C. Dut <sup>4</sup> , C. Plant <sup>15</sup> , T. MacDonald <sup>15</sup> , M. Riccardi <sup>7</sup> , S. Muraru <sup>7</sup> |
| <b>Z22514</b> | D75476 | Black rock<br>skink                       | <i>Egernia saxatilis</i>        | 24/11/2012 | Grampians<br>National Park,<br>Tower Hill                                                                    | n/a      | E. Zuccala <sup>1</sup> , T. Johanson <sup>1</sup> , H. Eason <sup>1</sup> , K.J. Tan <sup>1</sup> , Ann <sup>1</sup> , J. Newcombe <sup>6</sup> , T. Straw <sup>6</sup> , I. Rusker <sup>9</sup> , S. Kydas <sup>9</sup> , J. Aguiar <sup>8</sup> , E. Barthe <sup>8</sup> , C. Carbone <sup>16</sup> , J. Chew <sup>16</sup> , B. Aprem <sup>7</sup> , T. Knight <sup>7</sup>                                                                                        |

|               |        |                      |                                     |            |                                                              |          |                                                                                                                                                                                                                                                                                                                                                                                                                                                                                                                                                             |
|---------------|--------|----------------------|-------------------------------------|------------|--------------------------------------------------------------|----------|-------------------------------------------------------------------------------------------------------------------------------------------------------------------------------------------------------------------------------------------------------------------------------------------------------------------------------------------------------------------------------------------------------------------------------------------------------------------------------------------------------------------------------------------------------------|
| <b>Z22515</b> | D75461 | Black rock skink     | <i>Egernia saxatilis</i>            | 24/11/2012 | Grampians National Park                                      | n/a      | S. Chau <sup>1</sup> , S. Cassim <sup>1</sup> , G. Jones <sup>1</sup> , H. Vanyai <sup>1</sup> , J. Koffeyberg <sup>13</sup> , Z. Mihan <sup>13</sup> , T. Tran <sup>12</sup> , B. Kohr <sup>12</sup> , Shelly <sup>12</sup> , Jenny T. <sup>12</sup> , F. Anderson-Cleary <sup>5</sup> , L. Fisher <sup>5</sup>                                                                                                                                                                                                                                            |
| <b>Z26887</b> | D75751 | Black rock skink     | <i>Egernia saxatilis intermedia</i> | Nov-13     | Alpine National Park, Ramshorn peak to carpark and moth cave | MH028629 | L. Green <sup>1</sup> , S. Ostrouska <sup>1</sup> , B. Wood <sup>1</sup> , A. Lun <sup>1</sup> , D. Nguyen <sup>12</sup> , N. Phan <sup>12</sup> , M. Mazzeil <sup>7</sup> , B. Morales <sup>7</sup> , M. Vang <sup>7</sup> , C. Collett <sup>17</sup> , M. Walkden <sup>17</sup>                                                                                                                                                                                                                                                                           |
| <b>Z26888</b> | D75751 | Black rock skink     | <i>Egernia saxatilis intermedia</i> | Nov-13     | Alpine National Park, Ramshorn peak to carpark and moth cave | MH028629 | K. Rankin <sup>1</sup> , P. Gradie <sup>1</sup> , S. Belluzzo <sup>1</sup> , U. Chandrasiri <sup>1</sup> , J. Cartes <sup>10</sup> , S. Bedak <sup>10</sup> , B. Shaikh <sup>7</sup> , M. Iberras <sup>7</sup> , T. Rowlands <sup>17</sup> , D. Greenfield <sup>17</sup>                                                                                                                                                                                                                                                                                    |
| <b>Z26891</b> | D75754 | Black rock skink     | <i>Egernia saxatilis intermedia</i> | Nov-13     | Alpine National Park, Ramshorn peak to carpark and moth cave | MH028609 | S. Ostrouska <sup>1</sup> , S. Han <sup>1</sup> , K.J. Tan <sup>1</sup> , B. Wood <sup>1</sup> , K. Leckie <sup>3</sup> , E. Grace <sup>3</sup> , D. Smilek <sup>1</sup> , V. Pham <sup>4</sup> , J. Nguyen <sup>4</sup> , C. Benstead <sup>19</sup> , R. Boyd <sup>19</sup>                                                                                                                                                                                                                                                                                |
| <b>Z29306</b> | D75730 | Black rock skink     | <i>Egernia saxatilis intermedia</i> | Nov-13     | Alpine National Park, Limestone Road, waterfall              | MH028628 | S. Belluzzo <sup>1</sup> , A. Nguyen <sup>1</sup> , S. Preston <sup>1</sup> , J. Tcet <sup>12</sup> , W. Nguyen <sup>12</sup> , S. Webber <sup>10</sup> , H. Simon <sup>19</sup> , T. Langborne <sup>19</sup>                                                                                                                                                                                                                                                                                                                                               |
| <b>Z27240</b> | D75700 | Black rock skink     | <i>Egernia saxatilis intermedia</i> | Nov-13     | Alpine National Park, Rams Horn                              | MH028617 | S. Preston <sup>1</sup> , S. Moneer <sup>1</sup> , J. Hawkey <sup>1</sup> , H. McRae <sup>1</sup> , M. Kawa <sup>3</sup> , T. Marnsey <sup>3</sup> , S. Cleary <sup>1</sup> , S. Deev <sup>1</sup> , C. Trinh <sup>4</sup> , A. Thang <sup>4</sup> , J. Corsetti <sup>7</sup> , D. Arena <sup>7</sup>                                                                                                                                                                                                                                                       |
| <b>Z22407</b> | D75347 | Southern water skink | <i>Eulamprus tympanum tympanum</i>  | 19/11/2012 | Grampians National Park, Victoria Range Track                | n/a      | H. Eason <sup>1</sup> , S. Chockalingam <sup>1</sup> , S. Polling <sup>1</sup> , K.J. Tan <sup>1</sup> , U. Chandrasiri <sup>1</sup> , A. Lun <sup>1</sup> , J. Stratton <sup>1</sup> , E. Vergnano <sup>8</sup> , F. Sampaio <sup>8</sup> , Tracy <sup>12</sup> , Helena <sup>12</sup> , James <sup>12</sup> , Terri <sup>12</sup> , S. Manniche <sup>16</sup> , B. Gregoire <sup>16</sup> , J. Pentland <sup>5</sup> , H. De Oliveira <sup>5</sup> , C. Forth <sup>7</sup> , K. Kassar <sup>7</sup> , C. Ignatiaois <sup>2</sup> , D. Kaldas <sup>2</sup> |
| <b>Z22529</b> | D75458 | Southern Water skink | <i>Eulamprus tympanum tympanum</i>  | 24/11/2012 | Grampians National Park, Golten Gorge Picnic Area            | n/a      | S.Chau <sup>1</sup> , M. Lau <sup>1</sup> , S. Han <sup>1</sup> , B. Steed <sup>1</sup> , R. O'Regan <sup>9</sup> , M. Manteit <sup>9</sup> , Joanna <sup>12</sup> , Kathy <sup>12</sup> , C. Parus <sup>16</sup> , M. O'Sullivan <sup>16</sup> , G. Radojic <sup>7</sup> , G. Vervoort <sup>7</sup>                                                                                                                                                                                                                                                        |

|               |        |                      |                                    |            |                                                                        |          |                                                                                                                                                                                                                                                                                                                                                                    |
|---------------|--------|----------------------|------------------------------------|------------|------------------------------------------------------------------------|----------|--------------------------------------------------------------------------------------------------------------------------------------------------------------------------------------------------------------------------------------------------------------------------------------------------------------------------------------------------------------------|
| <b>Z22546</b> | D75439 | Southern Water skink | <i>Eulamprus tympanum tympanum</i> | 24/11/2012 | Grampians National Park, Roses Gap, Beehive Falls                      | n/a      | D. Yilmaz <sup>1</sup> , S. Longmuir <sup>1</sup> , C. Abbott <sup>1</sup> , H. Vanyai <sup>1</sup> , J. Stratton <sup>1</sup> , A. Harper <sup>6</sup> , D. Simpson <sup>6</sup> , J. Claire <sup>9</sup> , J. Bennet <sup>9</sup> , J. Nguyen <sup>12</sup> , J. Ly <sup>12</sup> , E. Vatcky <sup>2</sup> , S. Thanaskanda <sup>2</sup>                         |
| <b>Z26840</b> | D75592 | Southern water skink | <i>Eulamprus tympanum tympanum</i> | Nov-13     | Alpine National Park, road to Rams Horn 3                              | MH028627 | U. Chandrasiri <sup>1</sup> , K. Rankin <sup>1</sup> , A. Nguyen <sup>1</sup> , L. Green <sup>1</sup> , D. Leiskie <sup>17</sup> , T. Gatkuoth <sup>10</sup> , E. Fletcher-Lyle <sup>17</sup> , H. Robertson <sup>17</sup>                                                                                                                                         |
| <b>Z27151</b> | D75596 | Southern water skink | <i>Eulamprus tympanum tympanum</i> | Nov-13     | Alpine National Park, Native Dog Flat                                  | MH028633 | W.J. Scanlan <sup>1</sup> , B. Wood <sup>1</sup> , L. Green <sup>1</sup> , R. Golaw <sup>7</sup> , T. Waqalevu <sup>7</sup> , K. Shawcroft <sup>17</sup> , R. Dean <sup>17</sup>                                                                                                                                                                                   |
| <b>Z27153</b> | D75598 | Southern water skink | <i>Eulamprus tympanum tympanum</i> | Nov-13     | Alpine National Park, Rocky Plain Creek, off Limestone Creek           | MH028623 | S. Chau <sup>1</sup> , S. Ostrouska <sup>1</sup> , B. Steed <sup>1</sup> , B. Wood <sup>1</sup> , N. Lewis <sup>3</sup> , S. Pollard <sup>3</sup> , E. Akkaplan <sup>12</sup> , D. Nguyen <sup>12</sup> , F. Uraha <sup>7</sup> , M. Lambardo <sup>7</sup> , C. Treven <sup>19</sup> , S. Cornish <sup>19</sup>                                                    |
| <b>Z27158</b> | D75603 | Southern water skink | <i>Eulamprus tympanum tympanum</i> | Nov-13     | Alpine National Park, creek crossing below Davies Plain Hut Campground | MH028619 | P. Gradie <sup>1</sup> , S. Han <sup>1</sup> , A. Cutting <sup>1</sup> , S. Preston <sup>1</sup> , M.-T. Nguyen <sup>12</sup> , N. Astono <sup>12</sup> , K. Nguyen <sup>4</sup> , K. Tran <sup>4</sup> , J. Parker <sup>15</sup> , E. Garrett <sup>15</sup> , A. Quigley <sup>15</sup> , S. Struc <sup>19</sup> , K. Birch <sup>19</sup> , A. Banks <sup>19</sup> |
| <b>Z29168</b> | D75723 | Southern water skink | <i>Eulamprus tympanum tympanum</i> | Nov-13     | Alpine National Park, Limestone Road, Bouyard Creek crossing           | MH028618 | S. Preston <sup>1</sup> , Y. Pace <sup>1</sup> , J. Scanlan <sup>1</sup> , E. Matheson <sup>3</sup> , J. Burton <sup>3</sup> , S. Nicholas <sup>1</sup> , L. Vavvados <sup>1</sup> , E. Ayres <sup>4</sup> , M. Demirovic <sup>4</sup>                                                                                                                             |
| <b>Z22393</b> | D75353 | Grass skink          | <i>Lampropholis guichenoti</i>     | 20/11/2012 | Grampians National Park, The Pinnacle and Sundial Peak Picnic Area     | n/a      | A. Chowdhury <sup>1</sup> , A. Tokanovic <sup>1</sup> , C. Valkovic <sup>12</sup> , T. Read <sup>12</sup>                                                                                                                                                                                                                                                          |
| <b>Z27144</b> | D75585 | Grass skink          | <i>Lampropholis guichenoti</i>     | Nov-13     | Alpine National Park, Limestone                                        | MH028610 | S. Ostrouska <sup>1</sup> , S. Longmuir <sup>1</sup> , K. Rankin <sup>1</sup> , A. Nguyen <sup>1</sup> , G. Howell <sup>3</sup> , E. Thompson <sup>3</sup> , A. Catic <sup>12</sup> , R. Mansour <sup>12</sup> , Hanaira <sup>10</sup> , A. De Jong <sup>19</sup> , B. Smith <sup>19</sup>                                                                         |

|               |        |                    |                                |            |                                                                    |          |                                                                                                                                                                                                                                                                                                                                                           |
|---------------|--------|--------------------|--------------------------------|------------|--------------------------------------------------------------------|----------|-----------------------------------------------------------------------------------------------------------------------------------------------------------------------------------------------------------------------------------------------------------------------------------------------------------------------------------------------------------|
|               |        |                    |                                |            | Road, Native Dog Flat Campground                                   |          |                                                                                                                                                                                                                                                                                                                                                           |
| <b>Z29163</b> | D75719 | Grass skink        | <i>Lampropholis guichenoti</i> | Nov-13     | Alpine National Park, Bulley Creek at Cowombat Track               | MH028634 | A. Nguyen <sup>1</sup> , J. Hawkey <sup>1</sup> , H. McRae <sup>1</sup> , S. Chau <sup>1</sup> , N. Nuynh <sup>4</sup> , T. Nguyen <sup>4</sup> , L. Dunleavy <sup>19</sup> , J. Wynn <sup>19</sup> , S. Murnane <sup>17</sup> , D. Hughes <sup>17</sup> , O. Peacock <sup>17</sup>                                                                       |
| <b>Z29165</b> | D75725 | Grass skink        | <i>Lampropholis guichenoti</i> | Nov-13     | Alpine National Park, Rocky outcrop on Cowombat Track              | MH028611 | N. Donker <sup>1</sup> , Y. Pace <sup>1</sup> , P. Gradie <sup>1</sup> , U. Chandrasiri <sup>1</sup> , A. Wiltshire <sup>3</sup> , E. Werts <sup>3</sup> , J. Amanda <sup>1</sup> , Y. Duong <sup>1</sup> , P. Marriott <sup>10</sup> , J. Raqiza <sup>10</sup> , F. Faiyaz <sup>7</sup> , F. Yousif <sup>7</sup>                                         |
| <b>Z29305</b> | D75729 | Grass skink        | <i>Lampropholis guichenoti</i> | Nov-13     | Alpine National Park, Limestone Road, waterfall                    | MH028624 | L. Green <sup>1</sup> , J. Hawkey <sup>1</sup> , B. Steed <sup>1</sup> , S. Ostrouska <sup>1</sup> , N. Nguyen <sup>12</sup> , J. Niaz <sup>12</sup> , M. Benson <sup>7</sup> , K. Wild <sup>7</sup> , D. Gihoooley <sup>17</sup>                                                                                                                         |
| <b>Z29309</b> | D75734 | Grass skink        | <i>Lampropholis guichenoti</i> | Nov-13     | Alpine National Park, McFarlane Flat Track, Berrima Creek crossing | MH028620 | S. Han <sup>1</sup> , W.J. Scanlan <sup>1</sup> , A Cutting <sup>1</sup> , K. Isiah <sup>1</sup> , I. Houssein <sup>4</sup> , M. Huynh <sup>4</sup> , A. Coates <sup>15</sup> , E. Norris <sup>15</sup>                                                                                                                                                   |
| <b>Z22375</b> | D75369 | no common name     | <i>Lerista bougainvillii</i>   | 21/11/2012 | Grampians National Park, The Pinnacle and Sundial Peak Picnic Area | n/a      | S. Ostrouska <sup>1</sup> , A. Tokanovic <sup>1</sup> , K. Brovedani <sup>1</sup> , Pat <sup>12</sup> , Ken <sup>12</sup> , G. Anderson <sup>5</sup> , N. Davis <sup>5</sup> , D. Pluckrose <sup>18</sup> , L. Woods <sup>18</sup>                                                                                                                        |
| <b>Z22376</b> | D75370 | no common name     | <i>Lerista bougainvillii</i>   | 21/11/2012 | Grampians National Park, The Pinnacle and Sundial Peak Picnic Area | n/a      | G. Jones <sup>1</sup> , C. Diaz <sup>1</sup> , Kathy <sup>12</sup> , Jenny N <sup>12</sup> , J. Li <sup>16</sup> , A. Jaros <sup>16</sup>                                                                                                                                                                                                                 |
| <b>Z22552</b> | D75431 | Eastern Banjo Frog | <i>Limnodynastes dumerilii</i> | 23/11/2012 | Black Range State Forest, Muirfoot Track                           | n/a      | C. Abbott <sup>1</sup> , S. Polling <sup>1</sup> , R. Manhire-Heath <sup>1</sup> , B. Steed <sup>1</sup> , Ann <sup>1</sup> , E. Moss <sup>1</sup> , M. Roberts <sup>1</sup> , Karren <sup>1</sup> , Nikki <sup>1</sup> , L. Palmarella <sup>1</sup> , C. Goodman <sup>1</sup> , M. Bevis <sup>1</sup> , R. Cannon <sup>1</sup> , K. Wappett <sup>1</sup> |

|               |        |                    |                                   |            |                                                                                               |          |                                                                                                                                                                                                                                                                                                                              |
|---------------|--------|--------------------|-----------------------------------|------------|-----------------------------------------------------------------------------------------------|----------|------------------------------------------------------------------------------------------------------------------------------------------------------------------------------------------------------------------------------------------------------------------------------------------------------------------------------|
| <b>Z22567</b> | D75428 | Eastern Banjo Frog | <i>Limnodynastes dumerilii</i>    | 23/11/2012 | Black Range State Forest, Muirfoot Track                                                      | n/a      | S. Han <sup>1</sup> , J. Scanlan <sup>1</sup> , A. Lun <sup>1</sup> , B. Steed <sup>1</sup> , B. Carrucan <sup>16</sup> , G. Duffy <sup>16</sup> , K. Forest <sup>16</sup> , K. Myles <sup>16</sup> , S. Kumar <sup>7</sup> , M. Elias <sup>7</sup> , P. Pastrokos <sup>7</sup> , S. Masoe <sup>7</sup>                      |
| <b>Z22378</b> | D75372 | White's skink      | <i>Liopholis whitii</i>           | 21/11/2012 | Grampians National Park, The Pinnacle and Sundial Peak Picnic Area                            | n/a      | T. Johanson <sup>1</sup> , S. Chockalingam <sup>1</sup> , R. Manhire-Heath <sup>1</sup> , J. Stratton <sup>1</sup> , B. Allen <sup>9</sup> , G. Bradford <sup>9</sup> , Cindy <sup>12</sup> , Jasmine <sup>12</sup> , N. Petropoulos <sup>5</sup> , M. Hamid <sup>5</sup> , D. Paris <sup>2</sup> , A. Molinaro <sup>2</sup> |
| <b>Z22379</b> | D75373 | White's skink      | <i>Liopholis whitii</i>           | 21/11/2012 | Grampians National Park, The Pinnacle and Sundial Peak Picnic Area                            | n/a      | D. Yilmaz <sup>1</sup> , S. Moneer <sup>1</sup> , A. Chowdhury <sup>1</sup> , C. Diaz <sup>1</sup> , A. Allan <sup>6</sup> , G. Leeson <sup>6</sup> , D. Tan <sup>11</sup> , K. Duniter <sup>11</sup> , N. Wilkolawski <sup>12</sup> , D. Alispahic <sup>12</sup> , M. Kelly <sup>16</sup> , C. Sharp <sup>16</sup>          |
| <b>Z22520</b> | D75466 | no common name     | <i>Morethia boulengeri</i>        | 24/11/2012 | Grampians National Park, area surrounding Mount Zero Picnic Area and Hollow Mountain car park | n/a      | M. Lau <sup>1</sup> , A. Tokanovic <sup>1</sup> , Truong <sup>12</sup> , Samiha <sup>12</sup> , G. Flanagan <sup>5</sup> , A. Constable <sup>5</sup>                                                                                                                                                                         |
| <b>Z22558</b> | D75434 | no common name     | <i>Morethia boulengeri</i>        | 24/11/2012 | Grampians National Park, area surrounding Mount Zero Picnic Area and Hollow Mountain car park | n/a      | F. Angrisano <sup>1</sup> , K. Brovedani <sup>1</sup> , A. Davislim <sup>9</sup> , T. Tran <sup>9</sup> , A. Campbell <sup>18</sup> , E. Ellis <sup>18</sup>                                                                                                                                                                 |
| <b>Z27130</b> | D75888 | Tussock skink      | <i>Pseudemoia entrecasteauxii</i> | Nov-13     | Alpine National Park, road to Rams Horn 3                                                     | MH028613 | K.J. Tan <sup>1</sup> , P. Gradie <sup>1</sup> , Y. Pace <sup>1</sup> , H. McDonough <sup>3</sup> , J. Featherstone <sup>3</sup> , K. Lee <sup>12</sup> , M.-A. Ho <sup>12</sup> , L. Aylin <sup>12</sup> , V. Ibrahim <sup>12</sup> , D. Hayes <sup>10</sup> , J. Welbourne <sup>10</sup>                                   |

|               |        |                            |                                   |            |                                                                  |          |                                                                                                                                                                                                                                                                                                                               |
|---------------|--------|----------------------------|-----------------------------------|------------|------------------------------------------------------------------|----------|-------------------------------------------------------------------------------------------------------------------------------------------------------------------------------------------------------------------------------------------------------------------------------------------------------------------------------|
| <b>Z27145</b> | D75586 | Tussock skink              | <i>Pseudemoia entrecasteauxii</i> | Nov-13     | Alpine National Park, Rams Horn Track                            | MH028621 | A. Nguyen <sup>1</sup> , K.J. Tan <sup>1</sup> , U. Chandrasiri <sup>1</sup> , H. McRae <sup>1</sup> , P. Tran <sup>4</sup> , N. Mani <sup>7</sup> , J. Smith <sup>7</sup> , G. Garwood <sup>19</sup> , K. Triffett <sup>19</sup>                                                                                             |
| <b>Z27154</b> | D75599 | Tussock skink              | <i>Pseudemoia entrecasteauxii</i> | Nov-13     | Alpine National Park, Rocky Plain Creek                          | MH028625 | W.J. Scanlan <sup>1</sup> , Y. Pace <sup>1</sup> , S. Belluzzo <sup>1</sup> , A. Dornish <sup>10</sup> , F. To <sup>4</sup> , Y. Hagi <sup>4</sup> , N. Watson <sup>7</sup> , K. Broder <sup>7</sup>                                                                                                                          |
| <b>Z27182</b> | D75644 | Tussock skink              | <i>Pseudemoia entrecasteauxii</i> | Nov-13     | Alpine National Park, Limestone Road, Native Dog Flat Campground | MH028612 | S. Chau <sup>1</sup> , A. Cutting <sup>1</sup> , B. Steed <sup>1</sup> , I.S. Paul <sup>3</sup> , J. Stewart <sup>3</sup> , E. Nada <sup>1</sup> , C. Petricevic <sup>1</sup> , R. Medina <sup>7</sup> , S. Eshow <sup>7</sup> , J. Geer <sup>17</sup> , J. Wynne <sup>17</sup>                                               |
| <b>Z27232</b> | D75696 | Tussock skink              | <i>Pseudemoia entrecasteauxii</i> | Nov-13     | Alpine National Park, Davies Plain track                         | MH028631 | S. Belluzzo <sup>1</sup> , K. Rankin <sup>1</sup> , A. Nguyen <sup>1</sup> , A. Lun <sup>1</sup> , K. Nguyen <sup>12</sup> , T. La <sup>12</sup> , Shaz <sup>10</sup> , Sarah <sup>10</sup> , J. Brooks <sup>19</sup> , S. May <sup>19</sup> , H. Smith <sup>19</sup> , J. Lothian <sup>17</sup> , F. MacDonald <sup>17</sup> |
| <b>Z27139</b> | D75897 | Mountain dragon            | <i>Rankinia diemensis</i>         | 19/11/2013 | Victoria, Alpine National Park, Rams Horn Track                  | MH028615 | S. Preston <sup>1</sup> , K. Rankin <sup>1</sup> , H. McRae <sup>1</sup> , N. Donker <sup>1</sup> , A. Pan <sup>3</sup> , K. Agraviador <sup>3</sup> , Aiden <sup>10</sup> , Miles <sup>10</sup> , T. Frazier <sup>7</sup> , A. Brewster <sup>7</sup> , R. Currie <sup>7</sup> , A. Holmberg <sup>7</sup>                     |
| <b>Z27169</b> | D75631 | Mountain dragon            | <i>Rankinia diemensis</i>         | Nov-13     | Alpine National Park, road to Rams Horn 3                        | MH028614 | N. Donker <sup>1</sup> , K.J. Tan <sup>1</sup> , U. Chandrasiri <sup>1</sup> , B. Wood <sup>1</sup> , R. Jennings <sup>3</sup> , B. Douglass <sup>3</sup> , K. Lam <sup>4</sup> , E. Chu <sup>4</sup> , M. Sumperos <sup>7</sup> , J. Totino <sup>7</sup> , B. Slade <sup>19</sup> , D. Berdilek <sup>19</sup>                |
| <b>Z27171</b> | D75633 | Mountain dragon            | <i>Rankinia diemensis</i>         | Nov-13     | Alpine National Park, Cowombat track near Murray River           | MH028616 | K.J. Tan <sup>1</sup> , P. Gradie <sup>1</sup> , S. Han <sup>1</sup> , J. Smart <sup>3</sup> , A. Stones <sup>3</sup> , J. Pinijaram <sup>12</sup> , T. Lam <sup>12</sup> , B. Fernando <sup>1</sup>                                                                                                                          |
| <b>Z27183</b> | D75645 | Mountain dragon            | <i>Rankinia diemensis</i>         | Nov-13     | Alpine National Park, Cowombat Flat Track                        | MH028626 | K. Rankin <sup>1</sup> , S. Belluzzo <sup>1</sup> , A. Lun <sup>1</sup> , U. Chandrasiri <sup>1</sup> , J. Duell <sup>1</sup> , D. Goodall <sup>1</sup> , E. Dixon-Sole <sup>1</sup> , A. Hinton <sup>1</sup> , L. Smith <sup>1</sup> , J. Knowles <sup>1</sup>                                                               |
| <b>Z27196</b> | D75655 | Blotched bluetongue lizard | <i>Tiliqua nigrolutea</i>         | Nov-13     | Alpine National Park, Wambargo Range, Limestone Road             | n/a      | S. Moneer <sup>1</sup> , J. Hawkey <sup>1</sup> , S. Longmuir <sup>1</sup> , M. Flamenco <sup>1</sup> , K. Tavazina <sup>1</sup> , S. Nguyen <sup>12</sup> , Q. Nguyen <sup>12</sup> , S. van Staden <sup>12</sup> , J. Tsemetzis <sup>12</sup> , N. Ma <sup>4</sup> , L.H. Par <sup>4</sup>                                  |
| <b>Z22404</b> | D75344 | Shingleback, Sleepy Lizard | <i>Tiliqua rugosa</i>             | 19/11/2012 | Grampians National Park, intersection of                         | n/a      | M. Pert <sup>1</sup> , S. Walia <sup>1</sup> , H. Eason <sup>1</sup> , J. Cuxson <sup>1</sup> , S. Ostrouska <sup>1</sup> , M. Lau <sup>1</sup> , S. Polling <sup>1</sup> , J. Scanlan <sup>1</sup> , U. Chandrasiri <sup>1</sup> , Ann <sup>1</sup> , K. Brovedani <sup>1</sup> , O. Jewers-                                 |



|  |  |  |  |  |                                  |  |                                                                                                                                                                                                                                                                                                                                                                                                                                                                                                                                                   |
|--|--|--|--|--|----------------------------------|--|---------------------------------------------------------------------------------------------------------------------------------------------------------------------------------------------------------------------------------------------------------------------------------------------------------------------------------------------------------------------------------------------------------------------------------------------------------------------------------------------------------------------------------------------------|
|  |  |  |  |  | Syphon Road and<br>Glenelg River |  | Donohoe <sup>14</sup> , T. Fleeton <sup>6</sup> , M. Nicholls <sup>6</sup> , A. Miaskovski <sup>8</sup> , S. Kuttner <sup>8</sup> , S. Ozgur <sup>8</sup> , J. Moore <sup>8</sup> , Rabia <sup>12</sup> , Hainoame <sup>12</sup> , Peumi <sup>12</sup> , Louise <sup>12</sup> , Jaspeet <sup>12</sup> , Steph <sup>12</sup> , M. Selwood <sup>16</sup> , K. Southam <sup>16</sup> , M. Thavarajah <sup>5</sup> , G. Ryan <sup>5</sup> , J. Atwa <sup>2</sup> , Y. Karabatsos <sup>2</sup> , S. Weiss-O'Leary <sup>7</sup> , S. Peell <sup>7</sup> |
|--|--|--|--|--|----------------------------------|--|---------------------------------------------------------------------------------------------------------------------------------------------------------------------------------------------------------------------------------------------------------------------------------------------------------------------------------------------------------------------------------------------------------------------------------------------------------------------------------------------------------------------------------------------------|

<sup>1</sup> GTAC scientist mentor, <sup>2</sup> Alphington Grammar School, <sup>3</sup> Ballarat High School, <sup>4</sup> Braybrook Secondary College, <sup>5</sup> Brunswick Secondary College, <sup>6</sup> Castlemaine Secondary College, <sup>7</sup> Craigieburn Secondary College, <sup>8</sup> Elwood College, <sup>9</sup> Fitzroy High School, <sup>10</sup> Hallam Senior Secondary College, <sup>11</sup> Heritage College, <sup>12</sup> Keilor Downs Secondary College, <sup>13</sup> Lilydale Adventist Academy, <sup>14</sup> McClelland College, <sup>15</sup> Neerim District Secondary College, <sup>16</sup> Sacred Heart College, <sup>17</sup> Sandringham Secondary College, <sup>18</sup> Upper Yarra Secondary College, <sup>19</sup> Wallan Secondary Colleg
